# Supplementary material for: Investigation on modified polyether as an efficient CO2 thickener
Source: Royal Society of Chemistry journal article supplement (doi:10.1039/d0nj02442b), 2020-07-14
Supplement: d0nj02442b1.pdf [file d0nj02442b1.pdf]

## Supplementary information

for

### Investigation on modified polyether as efficient CO<sub>2</sub> thickener

Yongfei Zhang,<sup>a</sup> Zewen Zhu <sup>b</sup> and Jun Tang <sup>b,\*</sup>

**Esterification of the hydroxyl end group of polyether.** A large excess of acetyl chloride was used in all cases to ensure a complete reaction. In a typical experiment, 17.05 g (10 mmol -OH) PSAGEGPEAc and 4.13 g (40.8 mmol) triethylamine were dissolved into 100 mL anhydrous toluene under nitrogen atmosphere and then 3.14 g (40 mmol) acetyl chloride was slowly dropped into the mixture at ice-water bath. After keeping the mixture react overnight at room temperature, the mixture was filtered and the filtrate was washed with aqueous solution of NaHCO<sub>3</sub>, then dried and distilled under vacuum, thus obtained the desired product of PSAGEGPEAc (a colorless or light yellow viscous liquid with a yield of 91%).

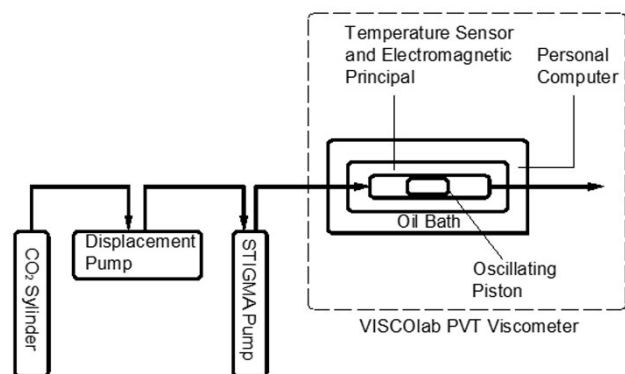

**Fig. S1 Viscosity measurement setup of polymer thickened CO<sub>2</sub>**

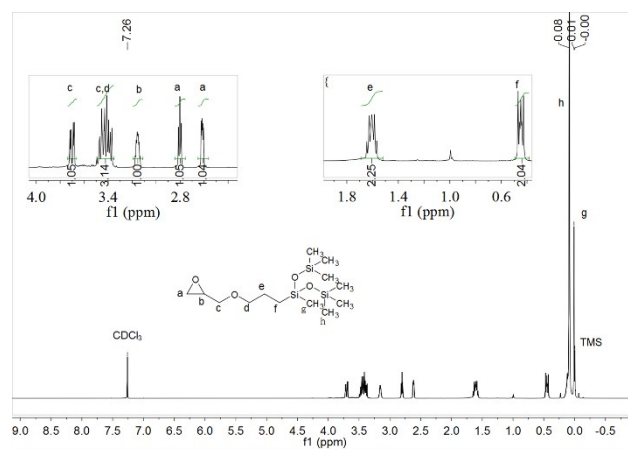

Fig. S2  $^1\text{H}$  NMR spectrum of SAGE.

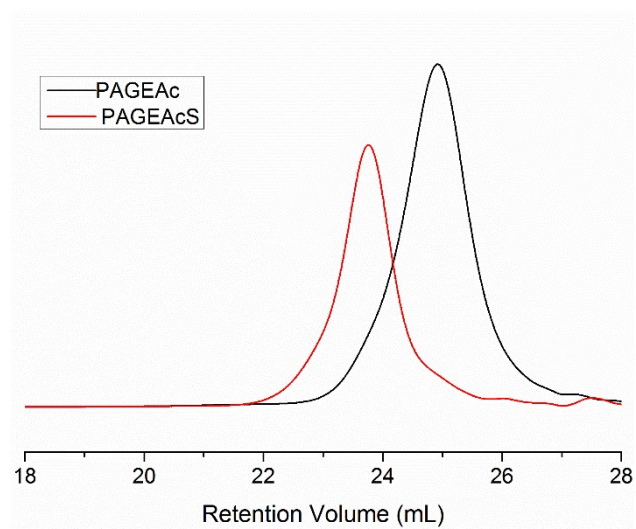

**Fig. S3 GPC spectra of PAGEAc and PAGEAcS.**

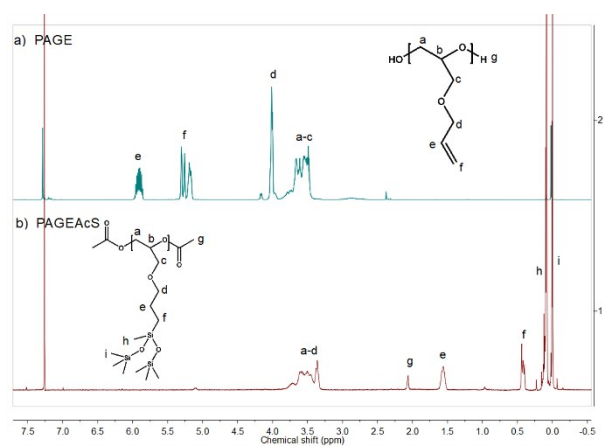

**Fig. S4  $^1\text{H}$  NMR spectra of PAGE and PAGEAcS**
